# Supplementary material
Source: Royal Society of Chemistry journal article supplement (doi:10.1039/d6dt00032k)
Supplement: d6dt00032k1.pdf [file d6dt00032k1.pdf]

## Supplementary Material

# Fully printable Sb<sub>2</sub>S<sub>3</sub>-based mesoscopic triple-stack solar cells: The influence of infiltration chemistry

Martín Faúndez<sup>a,c</sup>, Patricia Díaz<sup>a</sup>, Gonzalo Riveros<sup>a</sup>, Rodrigo Wittwer<sup>a</sup>, Francisco Martín<sup>b</sup>, Enrique Dalchiele<sup>d</sup>, Beatriz Heredia-Cervera<sup>e,f</sup>, Mahmoud Nabil<sup>e</sup>, Gerko Oskam<sup>e</sup>, Renan Escalante-Quijano<sup>e\*</sup>, Daniel Ramírez<sup>a\*</sup>

<sup>a</sup>Laboratorio de Electroquímica y Nanociencias (LEN), Instituto de Química y Bioquímica, Facultad de Ciencias, Universidad de Valparaíso, Avda. Gran Bretaña 1111, Playa Ancha, Valparaíso, Chile.

<sup>b</sup>Instituto Universitario de Materiales y Nanotecnología, IMANA, Departamento de Ingeniería Química, Universidad de Málaga, E29071 Málaga, Spain

<sup>c</sup>Departamento de Química, Universidad Técnica Federico Santa María, Avda. España 1680, Valparaíso, Chile.

<sup>d</sup>Facultad de Ingeniería, Instituto de Física, Universidad de la República, Herrera y Reissig 565, C.C. 30, Montevideo 11000, Uruguay

<sup>e</sup>Center for Nanoscience and Sustainable Technologies (CNATS), Department of Physical, Chemical and Natural Systems, Universidad Pablo de Olavide, 41013 Seville, Spain

<sup>f</sup>Department of Applied Physics, CINVESTAV-IPN, Merida 97310 Yucatan, Mexico

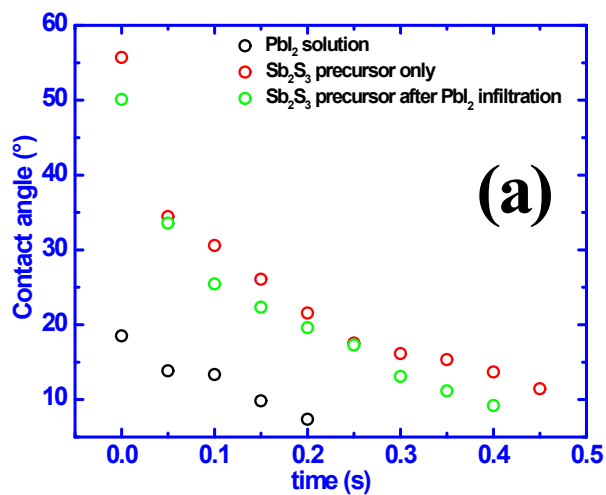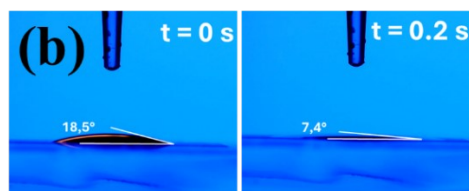

5  $\mu\text{L}$  0.4 M  $\text{PbI}_2$   
in DMSO at 50°C

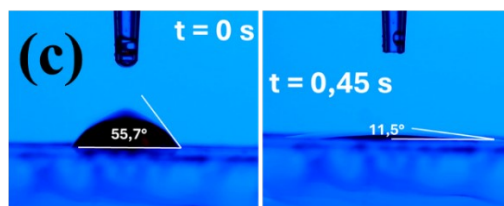

5  $\mu\text{L}$  2 M  $\text{SbCl}_3$  +  $\text{SC}(\text{NH}_2)_2$  (1:1.8)  
in DMF at 50°C

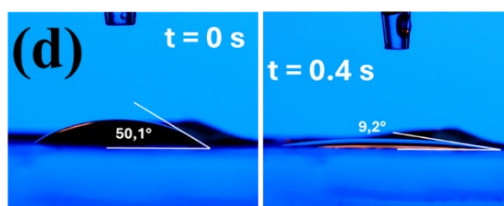

5  $\mu\text{L}$  2 M  $\text{SbCl}_3$  +  $\text{SC}(\text{NH}_2)_2$  (1:1.8)  
in DMF at 50°C over  
previously infiltrated  $\text{PbI}_2$

**Fig. SM1.** Contact angle measurements showing the high infiltration rate using the precursors.

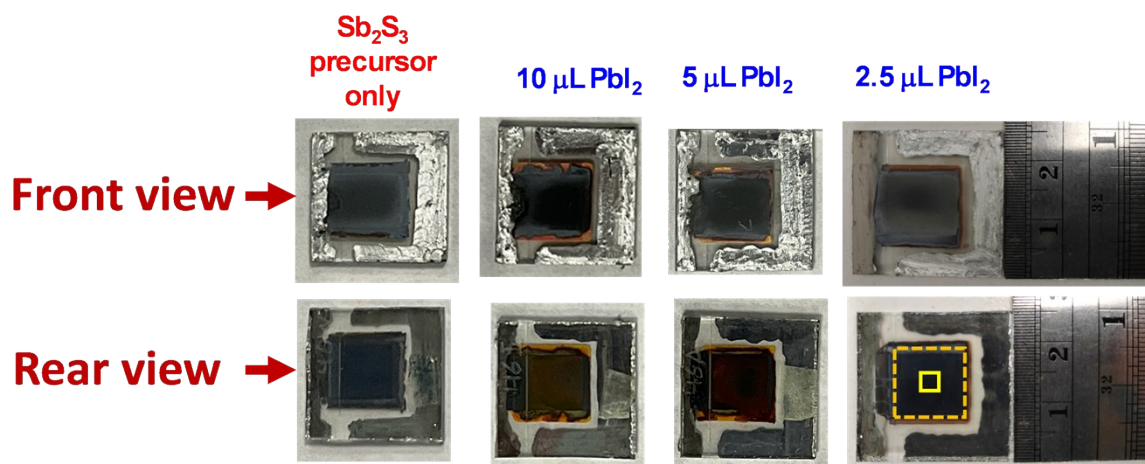

**Fig. SM2.** Photographs of solar cells. Dashed orange square indicates the infiltration region (active area) and the small yellow square indicates the masked area for characterizations ( $j$ - $V$  curves, EIS). Samples were illuminated on the rear side.

### ***Blocking layer effect of c-TiO<sub>2</sub>***

The spray pyrolyzed c-TiO<sub>2</sub> film was analysed by HR-TEM and cyclic voltammetry. Fig. SM2a,b depicts the feature of c-TiO<sub>2</sub> film which is conformal with the FTO morphology with a thickness near to 30 nm. The blocking layer effect of this film is clearly seen from Fig. SM3c where oxidation of ferrocyanide is fully suppressed and with a small reduction current density wave showing a potential peak shifted more than 400 mV towards more negative potentials compared to the FTO control. This reveals the good covering properties of c-TiO<sub>2</sub> with no defects such as pinholes despite being a very thin film, thus preventing short circuiting in solar cells due to exposing FTO to the photoactive layers after their infiltration and crystallization through the mesoscopic stack.

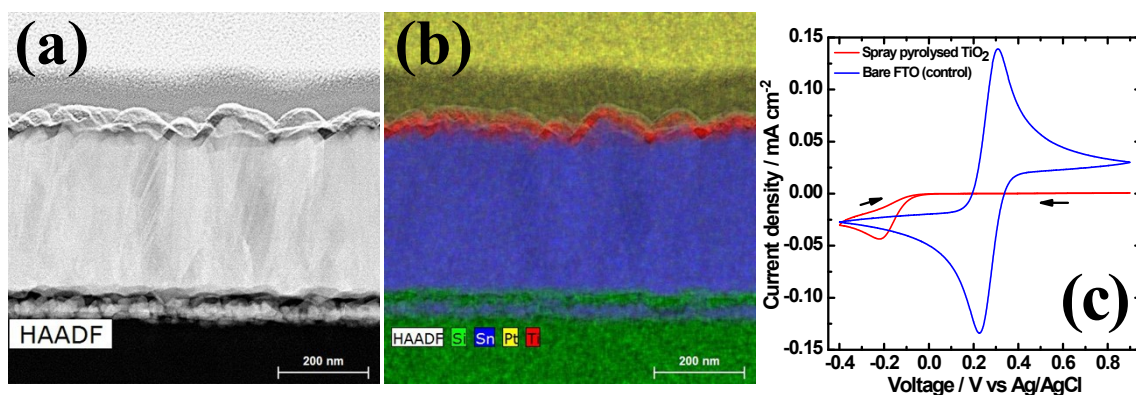

**Figure SM3.** HR-TEM images of spray pyrolyzed c-TiO<sub>2</sub> on FTO without (a) and with (b) elemental mapping by EDS and its electrochemical activity in aqueous ferri-ferro cyanide from cyclic voltammetry (c). Scan rate: 50 mV s<sup>-1</sup>.

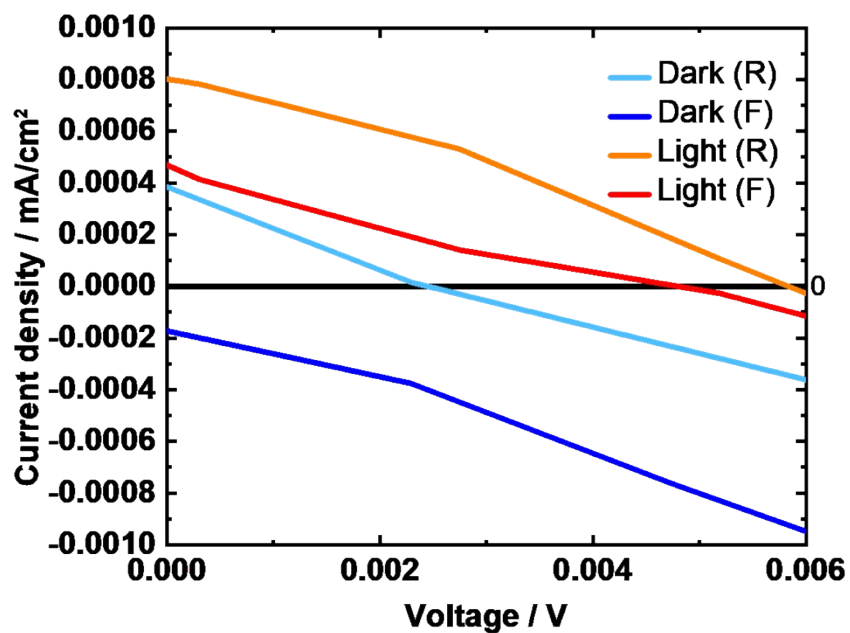

**Fig. SM4.**  $j$ - $V$  typical response (dark vs light) for samples infiltrated with stoichiometric amounts of  $\text{PbI}_2$  and  $\text{Sb}_2\text{S}_3$  precursors to form  $\text{Pb}_2\text{SbS}_2\text{I}_3$ . F: Forward and R: Reverse voltage bias. The scan rate was  $100 \text{ mVs}^{-1}$ . Series and parallel resistances ( $R_s$  and  $R_{pa}$ ) were calculated from the derivative of the  $j$ - $V$  data (light F/R) at open circuit and short circuit conditions, respectively.  $R_s$ :  $\sim 6 \text{ k}\Omega \text{ cm}^2$  and  $R_p$ :  $\sim 1.5 \Omega \text{ cm}^2$ .

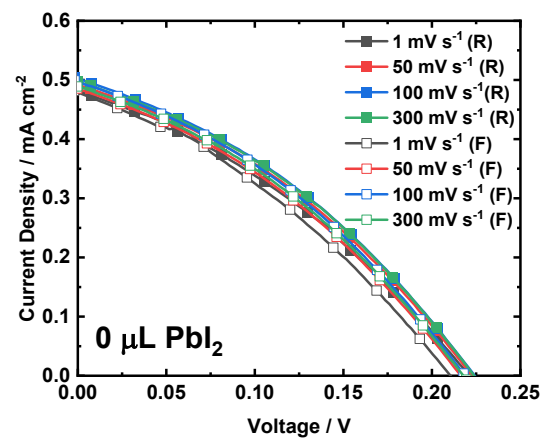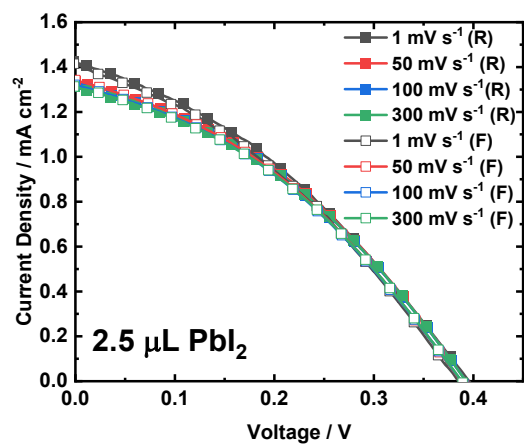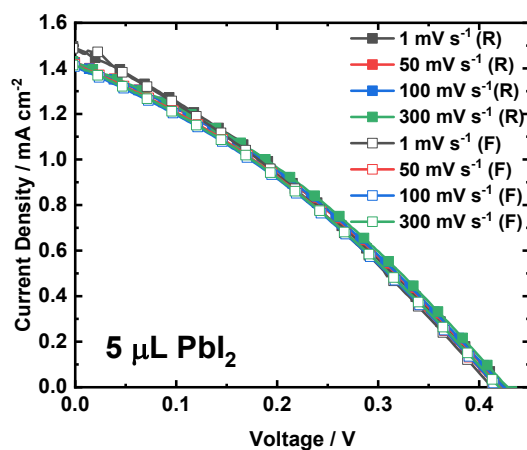

**Fig. SM5.** Effect of the scan rate over the  $j$ - $V$  response for samples infiltrated with 0, 2.5 and 5.0  $\mu\text{L}$  of  $\text{PbI}_2$  solution proving the absence of significant hysteresis. F: Forward and R: Reverse voltage bias.

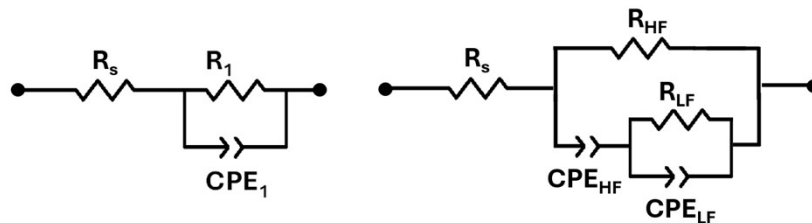

**Fig. SM6.** Left: Adapted Randles equivalent electric circuit used for fitting EIS data for samples infiltrated with  $\text{PbI}_2$ .  $R$  is considered a series resistance, whereas  $R_1$  a recombination resistance and  $\text{CPE}_1$  a constant phase element used to extract the effective capacitance interpreted as a geometrical capacitance. Right: Nested  $R_{\text{LF}}\text{-CPE}_{\text{LF}}$  (LF: low frequency) element connected in parallel to a  $R_{\text{HF}}\text{-CPE}_{\text{HF}}$  (HF: high frequency) element used to fit ESI data from samples infiltrated only with the  $\text{Sb}_2\text{S}_3$  precursor ( $0 \mu\text{L PbI}_2$  precursor).

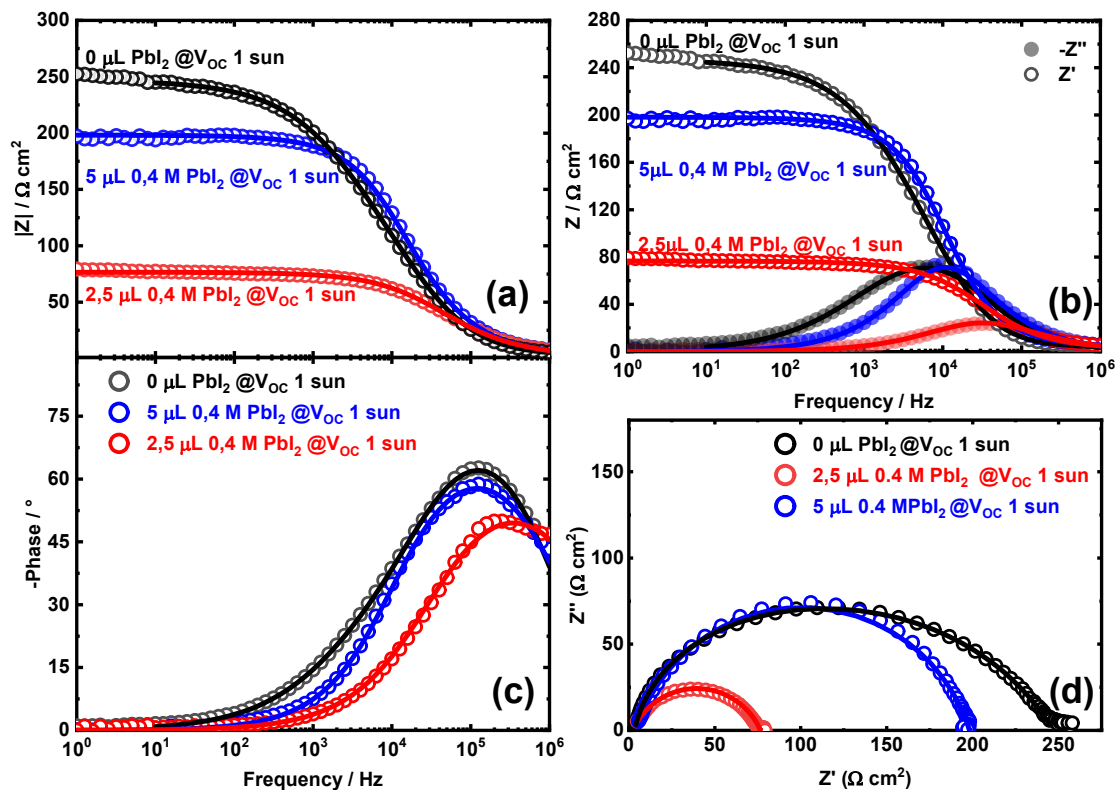

**Fig. SM7.** Module (a), Cole-Cole, phase (c) and Nyquist (d) diagrams from experimental data, taken at 1 sun and fitted with the “nested” and Randles equivalent electric circuits described in the Fig. SM6 and the main manuscript. Samples prepared by the two-step protocol using 0, 2.5 μL and 5.0 μL are represented by black, red and blue symbols (data) and lines (fit), respectively.
